# Supplementary material
Source: PubMed Central journal article supplement (PMC2519680)
Supplement: supp_82_17_8917__1.pdf [file supp_82_17_8917__1.pdf]

## Supplementary figure 1

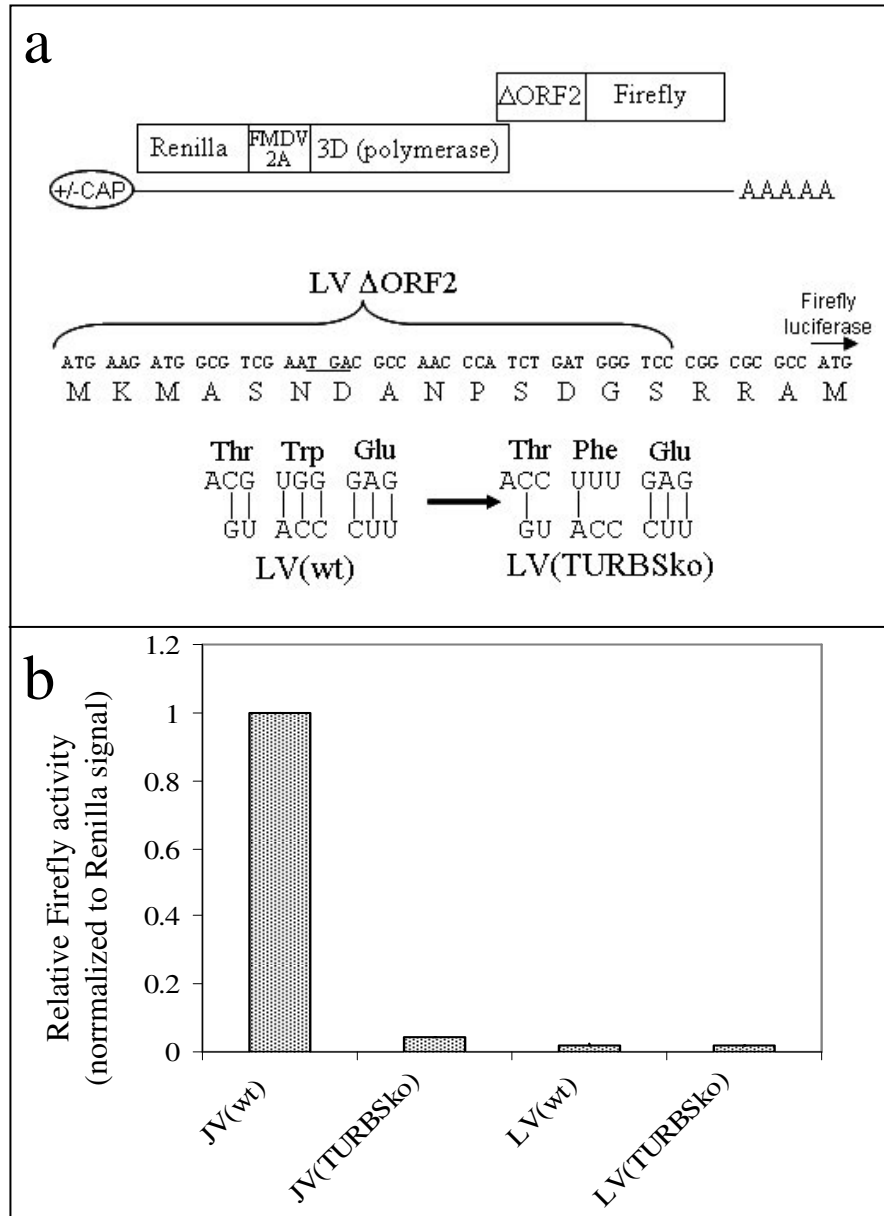

A diagram (a) summarizing the structure of RNA transcripts used to assess the level of translational termination re-initiation between ORF1 and ORF2 from Lordsdale virus (LV) where the putative TURBS1 motif was either maintained or disrupted. Details of both the nucleotide changes used to disrupt the putative TURBS1 motif and the sequence of the  $\Delta$ ORF2 / Firefly luciferase fusion are provided. Expression of Firefly luciferase activity in 293T cells transfected with 5 $\mu$ g of the two LV transcripts (b) or transfected with the comparable JV-based constructs described in the paper. Results are normalized to Renilla activity in JV(wt) transfected cells and represent the mean  $\pm$  sem from 3 separate experiments.
